# Supplementary material for: Eyeless uncouples mushroom body neuroblast proliferation from dietary amino acids in Drosophila
Source: eLife. 2017 Aug 9;6:e26343. doi: 10.7554/eLife.26343 (PMC5576483; doi:10.7554/eLife.26343)
Supplement: Figure 1—figure supplement 1—source data 1. — Also quantification of EdU-positive and Dpn-positive cells in control brains fed 48 hr before dietary amino acid removal and refeeding. [file elife-26343-fig1-figsupp1-data1.xlsx]

## Sheet: A
Time point	Animal / Lobe	# Dpn+ NBs
24 h fed	01a	122				24 h fed	7 d AFW
	01b	95			animals	5	3
	02a	98			lobes	8	6
	02b	97			MEAN	98.25	99.3333
	03a	107			MEDIAN	96.5	99.5
	04a	96			SD	12.3491	5.35413
	04b	92			SEM	4.36606	2.18581
	05a	79
7 d AFW	01a	104
	01b	106
	02a	92
	02b	95
	03a	101
	03b	98

## Sheet: B
Timepoint	Animal / lobe - cell	diameter 1 (um)	diameter 2 (um)	average
FH	01a-1	4.198	3.692	3.945				FH	24 h fed	7 d AFW	1 d refed (Edu-)	1 d refed (Edu+)	3 d refed
	01a-2	5.187	3.714	4.4505			animals	3	6	6	10	6	3
	01a-3	4.13	4.028	4.079			lobes	6	6	6	10	6	3
	01a-4	4.928	4.158	4.543			NBs analyzed	61	60	60	100	33	30
	01a-5	4.493	4.981	4.737			MEAN	4.23648	8.242	7.20361	7.44214	7.50812	10.3283
	01a-6	6.006	3.884	4.945			MEDIAN	4.114	8.06225	7.20125	7.38375	7.497	10.2213
	01a-7	3.849	3.793	3.821			SD	0.512643	0.824399	0.446795	0.611833	0.598965	0.982181
	01a-8	5.022	4.486	4.754			SEM	0.0656372	0.10643	0.057681	0.0611833	0.104266	0.179321
	01a-9	3.94	6.326	5.133
	01a-10	5.191	5.78	5.4855
	01b-1	3.756	4.01	3.883
	01b-2	4.066	4.089	4.0775
	01b-3	4.652	5.375	5.0135
	01b-4	6.158	4.778	5.468
	01b-5	6.247	4.669	5.458
	01b-6	5.858	3.426	4.642
	01b-7	3.613	3.958	3.7855
	01b-8	3.785	6.117	4.951
	01b-9	4.891	3.866	4.3785
	01b-10	4.799	4.772	4.7855
	02a-1	4.56	3.668	4.114
	02a-2	4.053	3.797	3.925
	02a-3	3.887	3.327	3.607
	02a-4	5.237	3.934	4.5855
	02a-5	4.575	3.869	4.222
	02a-6	4.217	3.352	3.7845
	02a-7	5.018	4.04	4.529
	02a-8	4.2	4.021	4.1105
	02a-9	4.476	5.148	4.812
	02a-10	4.17	3.793	3.9815
	02b-1	3.328	3.786	3.557
	02b-2	3.511	3.685	3.598
	02b-3	4.078	4.161	4.1195
	02b-4	3.576	4.252	3.914
	02b-5	3.321	4.528	3.9245
	02b-6	3.131	4.701	3.916
	02b-7	3.75	3.677	3.7135
	02b-8	4.93	2.912	3.921
	02b-9	3.398	4.161	3.7795
	02b-10	3.235	4.86	4.0475
	03a-1	3.89	3.011	3.4505
	03a-2	3.415	4.395	3.905
	03a-3	5.201	3.65	4.4255
	03a-4	2.667	4.066	3.3665
	03a-5	3.617	4.195	3.906
	03a-6	3.044	3.856	3.45
	03a-7	3.836	3.711	3.7735
	03a-8	3.748	3.614	3.681
	03a-9	3.35	5.266	4.308
	03a-10	3.88	3.714	3.797
	03b-1	4.265	4.562	4.4135
	03b-2	4.772	4.474	4.623
	03b-3	4.049	4.332	4.1905
	03b-4	4.236	5.345	4.7905
	03b-5	5.208	4.104	4.656
	03b-6	3.773	4.058	3.9155
	03b-7	3.875	4.058	3.9665
	03b-8	4.75	3.735	4.2425
	03b-9	3.63	5.23	4.43
	03b-10	4.503	4.165	4.334
	03b-11	4.455	4.151	4.303
24h fed	01a-1	9.984	7.505	8.7445
	01a-2	9.865	7.883	8.874
	01a-3	8.549	8.543	8.546
	01a-4	11.301	7.643	9.472
	01a-5	6.806	7.45	7.128
	01a-6	8.036	6.558	7.297
	01a-7	8.096	7.729	7.9125
	01a-8	9.102	8.273	8.6875
	01a-9	8.631	6.941	7.786
	01a-10	10.245	7.158	8.7015
	02a-1	8.283	6.191	7.237
	02a-2	8.552	8.705	8.6285
	02a-3	8.668	7.401	8.0345
	02a-4	10.345	8.193	9.269
	02a-5	8.342	6.667	7.5045
	02a-6	8.193	7.218	7.7055
	02a-7	9.908	7.329	8.6185
	02a-8	7.877	7.6	7.7385
	02a-9	9.831	7.152	8.4915
	02a-10	12.152	11.044	11.598
	03a-1	10.162	7.386	8.774
	03a-2	10.027	8.393	9.21
	03a-3	8.606	7.34	7.973
	03a-4	9.063	7.114	8.0885
	03a-5	7.838	7.311	7.5745
	03a-6	8.475	6.476	7.4755
	03a-7	8.441	8.055	8.248
	03a-8	8.214	6.444	7.329
	03a-9	8.741	7.806	8.2735
	03a-10	9.866	7.329	8.5975
	04a-1	6.482	8.829	7.6555
	04a-2	6.962	7.616	7.289
	04a-3	7.988	7.836	7.912
	04a-4	8.662	10.026	9.344
	04a-5	11.63	8.984	10.307
	04a-6	8.382	9.101	8.7415
	04a-7	8.839	6.946	7.8925
	04a-8	9.25	6.589	7.9195
	04a-9	9.035	7.506	8.2705
	04a-10	9.767	7.929	8.848
	05a-1	7.947	7.413	7.68
	05a-2	7.806	6.319	7.0625
	05a-3	7.947	7.085	7.516
	05a-4	8.305	9.921	9.113
	05a-5	8.77	7.65	8.21
	05a-6	8.646	8.997	8.8215
	05a-7	8.79	10.136	9.463
	05a-8	6.319	7.607	6.963
	05a-9	8.807	7.265	8.036
	05a-10	7.559	8.143	7.851
	06a-1	7.816	8.523	8.1695
	06a-2	9.035	6.134	7.5845
	06a-3	7.329	7.578	7.4535
	06a-4	8.901	6.625	7.763
	06a-5	8.408	9.096	8.752
	06a-6	8.977	8.638	8.8075
	06a-7	8.742	7.32	8.031
	06a-8	8.221	6.951	7.586
	06a-9	8.786	6.871	7.8285
	06a-10	10.076	6.186	8.131
7 d AFW	01a-1	8.154	5.281	6.7175
	01a-2	8.321	7.078	7.6995
	01a-3	7.976	6.711	7.3435
	01a-4	8.184	6.985	7.5845
	01a-5	9.025	6.067	7.546
	01a-6	7.515	6.826	7.1705
	01a-7	7.921	7.139	7.53
	01a-8	7.491	6.867	7.179
	01a-9	7.896	7.62	7.758
	01a-10	7.799	6.801	7.3
	02a-1	7.906	6.96	7.433
	02a-2	8.065	7.976	8.0205
	02a-3	7.468	7.193	7.3305
	02a-4	8.315	7.723	8.019
	02a-5	8.167	6.245	7.206
	02a-6	7.957	6.418	7.1875
	02a-7	6.584	6.445	6.5145
	02a-8	7.526	7.009	7.2675
	02a-9	8.609	6.091	7.35
	02a-10	7.557	7.361	7.459
	03a-1	7.484	7.155	7.3195
	03a-2	8.441	5.952	7.1965
	03a-3	9.012	5.732	7.372
	03a-4	9.013	6.087	7.55
	03a-5	9.138	6.44	7.789
	03a-6	7.962	7.402	7.682
	03a-7	7.925	7.016	7.4705
	03a-8	7.508	6.484	6.996
	03a-9	8.248	7.197	7.7225
	03a-10	8.259	6.584	7.4215
	04a-1	6.632	8.115	7.3735
	04a-2	5.791	7.942	6.8665
	04a-3	5.501	7.748	6.6245
	04a-4	7.085	6.559	6.822
	04a-5	6.979	7.155	7.067
	04a-6	6.235	5.227	5.731
	04a-7	7.719	4.92	6.3195
	04a-8	7.468	6.194	6.831
	04a-9	7.816	6.318	7.067
	04a-10	6.519	6.551	6.535
	05a-1	6.659	8.183	7.421
	05a-2	5.886	7.831	6.8585
	05a-3	7.643	6.816	7.2295
	05a-4	7.752	5.745	6.7485
	05a-5	8.244	5.891	7.0675
	05a-6	5.954	7.879	6.9165
	05a-7	7.398	6.647	7.0225
	05a-8	7.14	5.941	6.5405
	05a-9	7.921	6.057	6.989
	05a-10	7.741	6.594	7.1675
	06a-1	7.749	6.888	7.3185
	06a-2	7.957	6.426	7.1915
	06a-3	6.766	6.024	6.395
	06a-4	8.513	6.611	7.562
	06a-5	7.667	6.682	7.1745
	06a-6	7.32	6.916	7.118
	06a-7	9.195	7.423	8.309
	06a-8	8.047	5.919	6.983
	06a-9	7.546	6.835	7.1905
	06a-10	8.184	7.098	7.641
1 d refed (Edu-)	01a-1	8.815	7.246	8.0305
	01a-2	6.733	7.396	7.0645
	01a-3	6.517	5.934	6.2255
	01a-4	7.207	6.079	6.643
	01a-5	7.197	7.52	7.3585
	01a-6	9.42	6.895	8.1575
	01a-7	8.198	6.747	7.4725
	01a-8	8.496	5.934	7.215
	01a-9	7.391	7.084	7.2375
	01a-10	8.293	6.496	7.3945
	02a-1	8.707	8.044	8.3755
	02a-2	8.785	5.059	6.922
	02a-3	7.414	5.373	6.3935
	02a-4	6.767	6.469	6.618
	02a-5	9.028	6.079	7.5535
	02a-6	8.03	6.069	7.0495
	02a-7	9.198	5.736	7.467
	02a-8	9.095	5.965	7.53
	02a-9	8.023	5.437	6.73
	02a-10	7.751	7.472	7.6115
	03a-1	8.465	8.378	8.4215
	03a-2	8.674	6.441	7.5575
	03a-3	8.516	8.251	8.3835
	03a-4	8.099	7.421	7.76
	03a-5	9.814	6.624	8.219
	03a-6	8.602	6.262	7.432
	03a-7	8.444	7.653	8.0485
	03a-8	7.534	5.19	6.362
	03a-9	8.281	10.275	9.278
	03a-10	9.134	8.902	9.018
	04a-1	7.325	7.047	7.186
	04a-2	8.116	7.406	7.761
	04a-3	9.408	6.784	8.096
	04a-4	9.895	5.069	7.482
	04a-5	7.603	5.908	6.7555
	04a-6	7.41	5.86	6.635
	04a-7	9.025	5.818	7.4215
	04a-8	9.539	6.812	8.1755
	04a-9	8.367	6.325	7.346
	04a-10	8.411	7.089	7.75
	05a-1	8.362	7.134	7.748
	05a-2	8.444	7.737	8.0905
	05a-3	6.805	6.266	6.5355
	05a-4	8.436	6.03	7.233
	05a-5	6.849	7.364	7.1065
	05a-6	9.049	5.67	7.3595
	05a-7	6.375	7.781	7.078
	05a-8	9.477	7.139	8.308
	05a-9	8.028	5.888	6.958
	05a-10	9.388	5.965	7.6765
	06a-1	7.204	7.542	7.373
	06a-2	10.048	7.302	8.675
	06a-3	8.261	5.098	6.6795
	06a-4	7.752	7.679	7.7155
	06a-5	8.464	6.756	7.61
	06a-6	7.877	7.37	7.6235
	06a-7	8.595	6.885	7.74
	06a-8	9.751	4.699	7.225
	06a-9	10.634	5.617	8.1255
	06a-10	7.669	7.613	7.641
	07a-1	7.739	6.758	7.2485
	07a-2	7.747	8.118	7.9325
	07a-3	7.685	6.374	7.0295
	07a-4	7.257	6.225	6.741
	07a-5	8.73	7.301	8.0155
	07a-6	8.889	7.158	8.0235
	07a-7	9.4	8.036	8.718
	07a-8	8.094	6.31	7.202
	07a-9	7.83	6.678	7.254
	07a-10	8.094	6.427	7.2605
	08a-1	7.785	6.31	7.0475
	08a-2	7.868	6.086	6.977
	08a-3	8.299	5.935	7.117
	08a-4	8.746	5.954	7.35
	08a-5	7.985	5.174	6.5795
	08a-6	8.56	7.555	8.0575
	08a-7	8.631	5.535	7.083
	08a-8	9.013	6.132	7.5725
	08a-9	10.216	6.992	8.604
	08a-10	7.999	6.247	7.123
	09a-1	7.018	5.98	6.499
	09a-2	7.232	6.948	7.09
	09a-3	8.925	6.559	7.742
	09a-4	8.907	5.527	7.217
	09a-5	7.529	5.995	6.762
	09a-6	8.658	5.817	7.2375
	09a-7	7.957	6.303	7.13
	09a-8	9.565	6.829	8.197
	09a-9	7.585	5.722	6.6535
	09a-10	8.51	6.388	7.449
	10a-1	9.013	5.558	7.2855
	10a-2	9.375	6.136	7.7555
	10a-3	9.095	6.09	7.5925
	10a-4	8.542	7.022	7.782
	10a-5	8.318	7.332	7.825
	10a-6	7.158	5.341	6.2495
	10a-7	7.58	7.458	7.519
	10a-8	8.089	5.646	6.8675
	10a-9	8.074	6.033	7.0535
	10a-10	7.603	5.86	6.7315
1 d refed (Edu+)	01a-1	6.862	5.481	6.1715
	01a-2	8.432	6.346	7.389
	01a-3	6.753	6.554	6.6535
	01a-4	8.555	6.726	7.6405
	01a-5	8.353	9.701	9.027
	01a-6	7.49	8.137	7.8135
	01a-7	8.293	7.791	8.042
	02a-1	5.092	10.668	7.88
	02a-2	8.217	5.452	6.8345
	02a-3	7.732	7.947	7.8395
	03a-1	7.487	6.845	7.166
	03a-2	8.2	6.12	7.16
	03a-3	7.581	7.487	7.534
	03a-4	8.54	6.454	7.497
	04a-1	8.011	7.268	7.6395
	04a-2	8.35	7.283	7.8165
	04a-3	8.84	8.133	8.4865
	04a-4	8.143	6.805	7.474
	04a-5	8.192	6.981	7.5865
	04a-6	8.797	7.751	8.274
	04a-7	8.644	5.863	7.2535
	04a-8	9.363	8.342	8.8525
	04a-9	8.047	6.99	7.5185
	04a-10	7.924	5.391	6.6575
	05a-1	8.109	6.479	7.294
	05a-2	8.261	6.504	7.3825
	06a-1	8.615	6.457	7.536
	06a-2	8.236	6.386	7.311
	06a-3	8.932	6.336	7.634
	06a-4	7.486	6.154	6.82
	06a-5	7.826	6.481	7.1535
	06a-6	8.205	6.787	7.496
	06a-7	7.535	6.333	6.934
3 d refed	01a-1	10.799	9.596	10.1975
	01a-2	13.629	9.463	11.546
	01a-3	10.221	9.374	9.7975
	01a-4	12.912	9.181	11.0465
	01a-5	8.611	8.927	8.769
	01a-6	13.447	8.009	10.728
	01a-7	12.014	8.74	10.377
	01a-8	13.241	7.941	10.591
	01a-9	9.175	10.307	9.741
	01a-10	8.138	8.586	8.362
	02a-1	10.751	9.963	10.357
	02a-2	10.387	9.697	10.042
	02a-3	12.51	7.98	10.245
	02a-4	12.682	11.963	12.3225
	02a-5	11.814	8.317	10.0655
	02a-6	11.703	10.459	11.081
	02a-7	10.137	8.331	9.234
	02a-8	10.182	9.027	9.6045
	02a-9	12.308	7.732	10.02
	02a-10	10.092	13.319	11.7055
	03a-1	11.462	10.13	10.796
	03a-2	10.086	8.453	9.2695
	03a-3	12.495	10.67	11.5825
	03a-4	11.553	9.906	10.7295
	03a-5	9.771	8.138	8.9545
	03a-6	10.737	9.174	9.9555
	03a-7	10.828	7.953	9.3905
	03a-8	14.455	10.256	12.3555
	03a-9	11.779	9.906	10.8425
	03a-10	13.464	6.815	10.1395

## Sheet: E
Time point	Animal / Lobe	# Dpn+ NBs
7 d AFW	01a	108				7 d AFW	10 d AFW	14 d AFW	10 d AFW+24hr refed	10 d AFW+ 72hr refed
	02a	99			animals	5	5	3	8	10
	03a	100			lobes	5	5	5	8	10
	04a	88			MEAN	99.6	102	100.8	95.375	94.1
	05a	103			MEDIAN	100	101	100	95.5	96
					SD	7.36885	2.91548	1.92354	8.10533	6.53962
10 d AFW	01a	99			SEM	3.29545	1.30384	0.860233	2.86567	2.06801
	02a	101
	03a	106
	04a	104
	05a	100
14 d AFW	01a	101
	01b	100
	02a	104
	02b	100
	03a	99
10 d AFW+24hr refed	01a	86
	02a	105
	03a	92
	04a	85
	05a	104
	06a	99
	07a	90
	08a	102
10 d AFW+72hr refed	01a	96
	02a	99
	03a	93
	04a	104
	05a	96
	06a	99
	07a	84
	08a	97
	09a	85
	10a	88

## Sheet: F
Time point	Animal / Lobe	# Dpn+ Edu+ cells	TOTAL Dpn+ cells	% Dpn+ Edu+ cells
7 d AFW	01a	59	108	0.546296			7 d AFW	10 d AFW	14 d AFW	10 d AFW+24hr refed	10 d AFW+ 72hr refed
	02a	50	99	0.505051		animals	5	5	3	8	10
	03a	66	100	0.66		lobes	5	5	5	8	10
	04a	34	88	0.386364		MEAN	0.518571	0.358345	0.239349	0.452763	0.604177
	05a	51	103	0.495146		MEDIAN	0.505051	0.29703	0.23	0.453268	0.502525
						SD	0.0987183	0.107171	0.066017	0.0900184	0.225349
10 d AFW	01a	28	99	0.282828		SEM	0.0441482	0.0479281	0.0295237	0.0318263	0.0712615
	02a	30	101	0.29703
	03a	30	106	0.283019
	04a	55	104	0.528846
	05a	40	100	0.4
14 d AFW	01a	21	101	0.207921
	01b	23	100	0.23
	02a	33	104	0.317308
	02b	29	100	0.29
	03a	15	99	0.151515
10 d AFW+24hr refed	01a	42	86	0.488372
	02a	61	105	0.580952
	03a	39	92	0.423913
	04a	47	85	0.552941
	05a	36	104	0.346154
	06a	32	99	0.323232
	07a	41	90	0.455556
	08a	46	102	0.45098
10 d AFW+72hr refed	01a	48	96	0.5
	02a	50	99	0.505051
	03a	64	93	0.688172
	04a	51	104	0.490385
	05a	39	96	0.40625
	06a	35	99	0.353535
	07a	75	84	0.892857
	08a	38	97	0.391753
	09a	74	85	0.870588
	10a	83	88	0.943182
