# Supplementary material for: Eyeless uncouples mushroom body neuroblast proliferation from dietary amino acids in Drosophila
Source: eLife. 2017 Aug 9;6:e26343. doi: 10.7554/eLife.26343 (PMC5576483; doi:10.7554/eLife.26343)
Supplement: Figure 1—source data 1. [file elife-26343-fig1-data1.xlsx]

## Sheet: OregonR
Time point	Animal / brain hemiphere	# Dpn+ Edu+ cells	TOTAL Dpn+ cells	% Dpn+ Edu+ cells
24 h fed	01a	93	122	0.762295			24 h fed	1 d AFW	3 d AFW	5 d AFW	7 d AFW	1 d refed	3d refed
	01b	78	95	0.821053		animals	5	4	7	3	3	10	4
	02a	85	98	0.867347		hemispheres	8	7	14	6	6	10	4
	02b	88	97	0.907216		MEAN	0.83012	0.73997	0.574761	0.125049	0.030535	0.107136	0.955747
	03a	79	107	0.738318		MEDIAN	0.83761	0.75	0.52638	0.104477	0.0316105	0.0695064	0.955797
	04a	82	96	0.854167		SD	0.0584922	0.0585139	0.182685	0.0944847	0.0115631	0.0797258	0.0402912
	04b	81	92	0.880435		SEM	0.0206801	0.0221162	0.0488246	0.0385732	0.00472063	0.0252115	0.0201456
	05a	64	79	0.810127
1d AFW	01a	84	108	0.777778
	01b	79	106	0.745283
	02a	62	94	0.659574
	02b	66	100	0.66
	03a	78	104	0.75
	04a	85	109	0.779817
	04b	88	109	0.807339
3 d AFW	01a	80	108	0.740741
	01b	84	110	0.763636
	02a	38	93	0.408602
	02b	37	94	0.393617
	03a	38	98	0.387755
	03b	26	90	0.288889
	04a	82	111	0.738739
	04b	81	107	0.757009
	05a	79	98	0.806122
	05b	82	104	0.788462
	06a	52	107	0.485981
	06b	43	99	0.434343
	07a	52	105	0.495238
	07b	63	113	0.557522
5 d AFW	01a	13	111	0.117117
	01b	9	98	0.0918367
	02a	25	92	0.271739
	02b	18	90	0.2
	03a	4	101	0.039604
	03b	3	100	0.03
7 d AFW	01a	3	104	0.0288462
	01b	1	106	0.00943396
	02a	3	92	0.0326087
	02b	4	95	0.0421053
	03a	4	101	0.039604
	03b	3	98	0.0306122
1 d refed	01a	25	94	0.265957
	02a	4	91	0.043956
	03a	4	88	0.0454545
	04a	4	85	0.0470588
	05a	12	95	0.126316
	06a	4	89	0.0449438
	07a	18	89	0.202247
	08a	8	87	0.091954
	09a	4	94	0.0425532
	10a	14	87	0.16092
3 d refed	01a	87	89	0.977528
	02a	72	79	0.911392
	03a	85	91	0.934066
	04a	72	72	1
