# Supplementary material for: Eyeless uncouples mushroom body neuroblast proliferation from dietary amino acids in Drosophila
Source: eLife. 2017 Aug 9;6:e26343. doi: 10.7554/eLife.26343 (PMC5576483; doi:10.7554/eLife.26343)
Supplement: Figure 2—figure supplement 1—source data 1. [file elife-26343-fig2-figsupp1-data1.xlsx]

## Sheet: A
Genotype	Animal / Lobe	# Edu+ MBNBs
control	01a	4					control	Dp110-CAAX	Dp60	AlkRNAi
	01b	4				animals	16	17	15	6
	02a	4				lobes	32	33	30	12
	02b	4				MEAN	3.78125	3.51515	3.63333	3.91667
	03a	4				MEDIAN	4	4	4	4
	03b	4				SD	0.659148	0.870388	0.614948	0.288675
	04a	4				SEM	0.116522	0.151515	0.112274	0.0833333
	04b	4
	05a	4
	05b	4
	06a	4
	06b	1
	07a	2
	07b	4
	08a	4
	08b	4
	09a	4
	09b	3
	10a	4
	10b	3
	11a	4
	11b	4
	12a	4
	12b	4
	13a	4
	13b	4
	14a	4
	14b	4
	15a	4
	15b	4
	16a	4
	16b	4
Dp110-CAAX	01a	4
	01b	4
	02a	4
	02b	3
	03a	4
	03b	4
	04a	3
	04b	1
	05a	4
	05b	4
	06a	4
	06b	3
	07a	4
	07b	3
	08a	4
	08b	4
	09a	4
	09b	4
	10a	4
	10b	3
	11a	4
	11b	4
	12a	4
	12b	4
	13a	4
	13b	4
	14a	4
	14b	4
	15a	1
	15b	3
	16a	2
	16b	2
	17a	4
Dp60	01a	3
	01b	2
	02a	4
	02b	4
	03a	3
	03b	4
	04a	3
	04b	4
	05a	4
	05b	3
	06a	4
	06b	2
	07a	4
	07b	4
	08a	4
	08b	4
	09a	4
	09b	4
	10a	4
	10b	4
	11a	3
	11b	3
	12a	4
	12b	3
	13a	4
	13b	4
	14a	4
	14b	4
	15a	4
	15b	4
Alk RNAi	01a	4
	01b	4
	02a	4
	02b	4
	03a	4
	03b	4
	04a	4
	04b	4
	05a	3
	05b	4
	06a	4
	06b	4

## Sheet: B
Genotype	Animal / lobe - cell	# Edu+ progeny per MBNB
control	01a-1	2			control	Dp110-CAAX	Dp60	Alk RNAi
	01a-2	3		animals	15	17	15	6
	01a-3	2		lobes	30	33	30	12
	01a-4	2		MBNBs analyzed	113	116	114	47
	01b-1	2		MEAN	1.68142	2.23276	3.13158	1.78723
	01b-2	3		MEDIAN	2	2	3	2
	01b-3	2		SD	0.759058	0.997611	1.61033	0.623321
	01b-4	2		SEM	0.00671733	0.0926259	0.150821	0.0909207
	02a-1	1
	02a-2	1
	02a-3	2
	02a-4	2
	02b-1	0
	02b-2	1
	02b-3	1
	02b-4	1
	03a-1	2
	03a-2	2
	03a-3	2
	03a-4	1
	03b-1	4
	03b-2	3
	03b-3	3
	03b-4	2
	04a-1	3
	04a-2	2
	04a-3	2
	04a-4	1
	04b-1	3
	04b-2	4
	04b-3	1
	04b-4	3
	05a-1	1
	05a-2	2
	05a-3	1
	05a-4	2
	05b-1	1
	05b-2	1
	05b-3	2
	05b-4	1
	06a-1	2
	06a-2	2
	06a-3	2
	06a-4	2
	06b-1	2
	06b-2	3
	06b-3	2
	06b-4	3
	07a-1	1
	07b-1	1
	07b-2	1
	08a-1	1
	08a-2	1
	08a-3	2
	08a-4	1
	08b-1	1
	08b-2	2
	08b-3	2
	08b-4	1
	09a-1	1
	09a-2	2
	09a-3	1
	09a-4	1
	09b-1	1
	09b-2	1
	09b-3	1
	10a-1	1
	10a-2	1
	10a-3	1
	10a-4	1
	10b-1	1
	10b-2	1
	10b-3	1
	11a-1	1
	11a-2	1
	11a-3	1
	11a-4	1
	11b-1	1
	11b-2	3
	11b-3	1
	11b-4	1
	12a-1	2
	12a-2	2
	12a-3	1
	12a-4	2
	12b-1	2
	12b-2	1
	12b-3	2
	12b-4	2
	13a-1	1
	13a-2	2
	13a-3	2
	13a-4	1
	13b-1	2
	13b-2	1
	13b-3	1
	13b-4	1
	14a-1	2
	14a-2	2
	14a-3	2
	14a-4	1
	14b-1	2
	14b-2	3
	14b-3	2
	14b-4	2
	15a-1	2
	15a-2	1
	15a-3	3
	15a-4	3
	15b-1	2
	15b-2	2
	15b-3	2
	15b-4	1
Dp60	01a-1	1
	01a-2	2
	01a-3	1
	01a-4	1
	01b-1	1
	01b-2	2
	01b-3	0
	01b-4	0
	02a-1	4
	02a-2	2
	02a-3	2
	02a-4	1
	02b-1	3
	02b-2	2
	02b-3	3
	02b-4	4
	03a-1	5
	03a-2	3
	03a-3	3
	03a-4	5
	03b-1	3
	03b-2	4
	03b-3	6
	04a-1	3
	04a-2	2
	04a-3	1
	04b-1	1
	04b-2	3
	04b-3	2
	04b-4	1
	05a-1	2
	05a-2	3
	05a-3	4
	05a-4	4
	05b-1	5
	05b-2	3
	05b-3	3
	06a-1	1
	06a-2	1
	06a-3	1
	06a-4	3
	06b-1	2
	06b-2	1
	06b-3	2
	07a-1	4
	07a-2	6
	07a-3	6
	07a-4	5
	07b-1	5
	07b-2	3
	07b-3	5
	07b-4	5
	08a-1	3
	08a-2	6
	08a-3	5
	08b-1	3
	08b-2	3
	08b-3	3
	08b-4	4
	09a-1	4
	09a-2	5
	09a-3	4
	09a-4	3
	09b-1	3
	09b-2	5
	09b-3	4
	09b-4	4
	10a-1	4
	10a-2	4
	10a-3	4
	10a-4	4
	10b-1	2
	10b-2	1
	10b-3	1
	10b-4	3
	11a-1	2
	11a-2	1
	11a-3	1
	11a-4	2
	11b-1	1
	11b-2	1
	11b-3	1
	11b-4	1
	12a-1	2
	12a-2	2
	12a-3	3
	12b-1	5
	12b-2	3
	12b-3	1
	12b-4	3
	13a-1	6
	13a-2	5
	13a-3	5
	13a-4	5
	13b-1	5
	13b-2	5
	13b-3	5
	13b-4	4
	14a-1	5
	14a-2	6
	14a-3	4
	14a-4	5
	14b-1	2
	14b-2	1
	14b-3	1
	14b-4	2
	15a-1	5
	15a-2	5
	15a-3	5
	15a-4	3
	15b-1	5
	15b-2	4
	15b-3	3
	15b-4	5
Dp110-CAAX	01a-1	3
	01a-2	3
	01a-3	3
	01a-4	2
	01b-1	1
	01b-2	1
	01b-3	3
	01b-4	2
	02a-1	4
	02a-2	2
	02a-3	2
	02a-4	1
	02b-1	1
	02b-2	1
	02b-3	2
	03a-1	3
	03a-2	2
	03a-3	3
	03a-4	3
	03b-1	2
	03b-2	2
	03b-3	1
	03b-4	2
	04a-1	2
	04a-2	1
	04a-3	2
	04b-1	3
	05a-1	4
	05a-2	2
	05a-3	2
	05a-4	2
	05b-1	1
	05b-2	1
	05b-3	1
	05b-4	1
	06a-1	2
	06a-2	2
	06a-3	1
	06a-4	2
	06b-1	2
	06b-2	2
	06b-3	1
	07a-1	2
	07a-2	4
	07a-3	2
	07a-4	2
	07b-1	1
	07b-2	1
	07b-3	1
	08a-1	2
	08a-2	2
	08a-3	4
	08a-4	3
	08b-1	1
	08b-2	2
	08b-3	3
	08b-4	2
	09a-1	3
	09a-2	2
	09a-3	2
	09a-4	3
	09b-1	1
	09b-2	3
	09b-3	4
	09b-4	3
	10a-1	5
	10a-2	4
	10a-3	5
	10a-4	5
	10b-1	5
	10b-2	1
	10b-3	4
	11a-1	1
	11a-2	3
	11a-3	3
	11a-4	1
	11b-1	5
	11b-2	2
	11b-3	2
	11b-4	4
	12a-1	1
	12a-2	1
	12a-3	2
	12a-4	3
	12b-1	2
	12b-2	1
	12b-3	2
	12b-4	3
	13a-1	2
	13a-2	5
	13a-3	3
	13a-4	3
	13b-1	2
	13b-2	2
	13b-3	2
	13b-4	2
	14a-1	3
	14a-2	3
	14a-3	1
	14a-4	2
	14b-1	3
	14b-2	2
	14b-3	3
	14b-4	2
	15a-1	2
	15b-1	1
	15b-2	2
	15b-3	2
	16a-1	1
	16a-2	1
	16b-1	1
	16b-2	2
	17a-1	1
	17a-2	3
	17a-3	1
	17a-4	1
Alk RNAi	01a-1	2
	01a-2	2
	01a-3	2
	01a-4	1
	01b-1	2
	01b-2	1
	01b-3	1
	01b-4	1
	02a-1	2
	02a-2	2
	02a-3	2
	02a-4	2
	02b-1	2
	02b-2	3
	02b-3	2
	02b-4	3
	03a-1	2
	03a-2	1
	03a-3	2
	03a-4	2
	03b-1	1
	03b-2	1
	03b-3	2
	03b-4	2
	04a-1	2
	04a-2	2
	04a-3	1
	04a-4	1
	04b-1	2
	04b-2	2
	04b-3	3
	04b-4	2
	05a-1	3
	05a-2	2
	05a-3	2
	05b-1	2
	05b-2	1
	05b-3	1
	05b-4	1
	06a-1	1
	06a-2	3
	06a-3	2
	06a-4	2
	06b-1	2
	06b-2	2
	06b-3	1
	06b-4	1
