# Supplementary material for: Eyeless uncouples mushroom body neuroblast proliferation from dietary amino acids in Drosophila
Source: eLife. 2017 Aug 9;6:e26343. doi: 10.7554/eLife.26343 (PMC5576483; doi:10.7554/eLife.26343)
Supplement: Figure 2—source data 1. [file elife-26343-fig2-data1.xlsx]

## Sheet: Dp110-CAAX
Time point	Animal / Lobe	# Dpn+ Edu+ cells	TOTAL Dpn+ cells	% Dpn+ Edu+ cells
24 h fed	01a	71	91	0.78022			24 h fed	1 d AFW	3 d AFW	5 d AFW	7 d AFW
	02a	85	91	0.934066		animals	10	3	13	7	8
	03a	82	89	0.921348		lobes	10	5	14	11	10
	04a	66	83	0.795181		MEAN	0.85954	0.969621	0.851396	0.520496	0.146445
	05a	78	91	0.857143		MEDIAN	0.864742	0.971154	0.86054	0.509804	0.129948
	06a	76	87	0.873563		SD	0.0677344	0.00968165	0.042403	0.122394	0.0786376
	07a	78	95	0.821053		SEM	0.0214195	0.00432977	0.0113327	0.0369033	0.0248674
	08a	93	96	0.96875
	09a	71	92	0.771739
	10a	82	94	0.87234
1 d AFW	01a	110	112	0.982143
	01b	111	115	0.965217
	02a	109	114	0.95614
	02b	110	113	0.973451
	03a	101	104	0.971154
3 d AFW	01a	90	101	0.891089
	02a	83	107	0.775701
	02b	80	98	0.816327
	03a	94	109	0.862385
	04a	82	94	0.87234
	05a	79	92	0.858696
	06a	75	93	0.806452
	07a	83	92	0.902174
	08a	71	85	0.835294
	09a	83	95	0.873684
	10a	72	89	0.808989
	11a	75	92	0.815217
	12a	71	77	0.922078
	13a	80	91	0.879121
5 d AFW	01a	29	92	0.315217
	01b	51	103	0.495146
	02a	37	97	0.381443
	02b	52	102	0.509804
	03a	72	101	0.712871
	03b	69	105	0.657143
	04a	49	100	0.49
	04b	39	94	0.414894
	05a	52	96	0.541667
	06a	63	96	0.65625
	07a	54	98	0.55102
7 d AFW	01a	14	96	0.145833
	01b	14	102	0.137255
	02a	27	102	0.264706
	02b	11	93	0.11828
	03a	13	106	0.122642
	05a	4	84	0.047619
	05a	17	94	0.180851
	06a	7	84	0.0833333
	07a	28	97	0.28866
	08a	7	93	0.0752688

## Sheet: Dp60
Timepoint	Animal / Lobe	# Dpn+ Edu+ cells	TOTAL Dpn+ cells	% Dpn+ Edu+ cells
24 h fed	01a	39	78	0.5			24 h fed	1 d AFW	3 d AFW	5 d AFW	7 d AFW
	02a	47	89	0.52809		animals	10	2	13	9	3
	03a	43	82	0.52439		lobes	10	4	15	13	6
	04a	54	98	0.55102		MEAN	0.514324	0.3686	0.242266	0.0863385	0.0575938
	05a	41	69	0.594203		MEDIAN	0.521935	0.379612	0.260417	0.0689655	0.0546265
	06a	29	71	0.408451		SD	0.0678216	0.0580648	0.0548347	0.0492822	0.0105642
	07a	47	76	0.618421		SEM	0.0214471	0.0290324	0.0141583	0.0136684	0.00431283
	08a	40	77	0.519481
	09a	36	74	0.486486
	10a	26	63	0.412698
1 d AFW	01a	36	90	0.4
	01b	39	92	0.423913
	02a	30	103	0.291262
	02b	37	103	0.359223
3 d AFW	01a	27	100	0.27
	01b	25	97	0.257732
	02a	25	90	0.277778
	02b	25	96	0.260417
	03a	18	66	0.272727
	04a	14	66	0.212121
	05a	24	76	0.315789
	06a	24	71	0.338028
	07a	13	68	0.191176
	08a	11	74	0.148649
	09a	22	83	0.26506
	10a	21	78	0.269231
	11a	14	69	0.202899
	12a	13	70	0.185714
	13a	13	78	0.166667
5 d AFW	01a	3	69	0.0434783
	01b	4	69	0.057971
	02a	4	88	0.0454545
	02b	1	91	0.010989
	03a	4	58	0.0689655
	03b	7	65	0.107692
	04a	5	79	0.0632911
	04b	10	78	0.128205
	05a	15	78	0.192308
	06a	12	87	0.137931
	07a	10	82	0.121951
	08a	7	79	0.0886076
	09a	4	72	0.0555556
7 d AFW	01a	4	69	0.057971
	01b	5	65	0.0769231
	02a	4	78	0.0512821
	02b	4	66	0.0606061
	03a	4	80	0.05
	03b	4	82	0.0487805

## Sheet: PH-Venus
Time point	Animal / Lobe	# PH:Venus+ MBNBs
FH	01a	0					FH	24 h fed	7 d AFW
	02a	0				animals	7	7	9
	02b	0				lobes	13	14	18
	03a	0				MEAN	0.0769231	2.5	0.111111
	03b	1				MEDIAN	0	3	0
	04a	0				SD	0.27735	1.22474	0.323381
	04b	0				SEM	0.0769231	0.327327	0.0762216
	05a	0
	05b	0
	06a	0
	06b	0
	07a	0
	07b	0
24h fed	01a	2
	01b	1
	02a	3
	02b	4
	03a	2
	03b	0
	04a	4
	04b	3
	05a	3
	05b	3
	06a	4
	06b	3
	07a	1
	07b	2
7 d AFW	01a	0
	01b	1
	02a	0
	02b	0
	03a	0
	03b	1
	04a	0
	04b	0
	05a	0
	05b	0
	06a	0
	06b	0
	07a	0
	07b	0
	08a	0
	08b	0
	09a	0
	09b	0
