# Supplementary material for: Eyeless uncouples mushroom body neuroblast proliferation from dietary amino acids in Drosophila
Source: eLife. 2017 Aug 9;6:e26343. doi: 10.7554/eLife.26343 (PMC5576483; doi:10.7554/eLife.26343)
Supplement: Figure 3—source data 1. [file elife-26343-fig3-data1.xlsx]

## Sheet: summary
Ey expression in MB NBs
				whole cell (total fluorescence)			nucleus (total fluorescence)			p values
		n	animals	mean	S.D.	rel. fluorescence	mean	S.D.		MB NBs	p values
FH	worGAL4 x OR (control)	12	3	1241.36	341.644	1	886.926	225.116		FH control to FH Ey RNAI	1.90496e-07
FH	worGAL4 x UAS Ey RNAi	12	3	243.775	119.094	0.196378				FH control to 24 hr fed	0.00932599
										24 hr fed to 7 d AFW	0.000925918
24 hr fed	worGAL4 x OR (control)	10	5	2000.59	554.312	1.61161	1278.95	320.379		24 hr fed control to 24 hr Ey O/E	0.00041893
24 hr fed	worGAL4 x UAS Ey OE	12	3	4533.52	1919.98	3.65206	3516.19	1465.48
7 AFW	worGAL4 x OR (control)	12	3	1023.55	264.159	0.824539
7 AFW	worGAL4 x UAS Ey OE	12	3	981.138	391.3	0.790374
Ey expression in non-MB NBs
				whole cell (total fluorescence)						non MB NBs
		n	animals	mean	S.D.	rel. fluorescence				24 fed Ey OE to 7 day AFW EY OE	0.00864396
24 hr fed	worGAL4 x OR (Ey neg)	10	5	38.295	168.921					24 hr fed control to 24 hr Ey O/E	0.0038409
24 hr fed	worGAL4 x OR (Ey pos)	13	4	1369.3	439.521	1
24 hr fed	worGAL4 x UAS Ey OE	12	3	3531.38	1809.22	2.57897
7 AFW	worGAL4 x UAS Ey OE	12	3	1355.18	1063.2

## Sheet: raw data
total fluorescence summary
For FIG 3R
	MB NBs
	control							EyRNAi			Ey OE
	FH		24 hr fed		7 d AFW			FH			24 hr fed		7 d AFW
	raw	normalized	raw	normalized	raw	normalized		raw	normalized		raw	normalized	raw	normalized
	868.816	0.699891	1707.15	1.37523	617.331	0.497303		213.654	0.172113		2019.8	1.62709	1398.26	1.1264
	1235.63	0.995388	2602.57	2.09655	796.004	0.641236		360.021	0.290022		2248.9	1.81164	1726.96	1.39119
	764.67	0.615995	2667.05	2.14849	1031.28	0.830764		32.48	0.0261649		7328.09	5.90328	607.88	0.489689
	702.341	0.565784	2640.04	2.12673	946.972	0.762851		60.8322	0.0490045		8559.57	6.89533	834.355	0.67213
	1255.49	1.01139	2048.97	1.65059	1166.13	0.939401		325.687	0.262363		4093.29	3.29742	623.254	0.502074
	1232.21	0.992626	921.76	0.742541	1322.18	1.06511		319.666	0.257513		3353.35	2.70135	894.179	0.720323
	1182.91	0.952913	1640.59	1.32161	1519.04	1.2237		385.148	0.310264		4444.02	3.57997	536.166	0.431919
	1704	1.37269	1912.28	1.54047	1075.65	0.86651		300.776	0.242296		3009.92	2.4247	936.812	0.754667
	1192.03	0.960262	1657.98	1.33562	925.619	0.74565		214.404	0.172717		5459.68	4.39815	1210.3	0.974977
	1425.35	1.14822	2207.53	1.77831	831.266	0.669642		191.573	0.154326		4272.29	3.44162	1425.28	1.14816
	1743.68	1.40466			1290.65	1.03971		151.834	0.122312		4782.79	3.85287	1049.7	0.845607
	1589.18	1.28019			760.458	0.612601		369.225	0.297436		4830.5	3.8913	530.504	0.427358
average	1241.36	1	2000.59	1.61161	1023.55	0.824539		243.775	0.196378		4533.52	3.65206	981.138	0.790374
std dev	341.644	0.275217	554.312	0.446537	264.159	0.212799		119.094	0.0959385		1919.98	1.54667	391.3	0.315219
		FH	RNAi	24 hr fed	24 hr fed Ey OE	7AFW	7AFW EyOE
	normalized	1	0.196378	1.61161	3.65206	0.824539	0.790374
	sem	0.0794484	0.0276951	0.141207	0.446486	0.0614296	0.0909959
FOR FIG 3S	MB NBs				non MB NBs
	control		Ey OE		control		Ey OE
	24 hr fed		24 hr fed		24 hr fed		24 hr fed
	raw	normal	raw	norm	raw	norm	raw
	1707.15	0.853322	2019.8	1.0096	985.965	0.492837	526.026	0.262935
	2602.57	1.3009	2248.9	1.12412	1138.06	0.568863	2116.03	1.0577
	2667.05	1.33313	7328.09	3.66296	1408.18	0.703882	4142.7	2.07074
	2640.04	1.31963	8559.57	4.27852	735.297	0.36754	5571.24	2.7848
	2048.97	1.02418	4093.29	2.04604	2215.03	1.10719	2021.78	1.01059
	921.76	0.460744	3353.35	1.67618	2077	1.03819	2482.48	1.24087
	1640.59	0.820054	4444.02	2.22135	994.768	0.497237	6403.81	3.20096
	1912.28	0.955857	3009.92	1.50451	1111.16	0.555418	4929.76	2.46415
	1657.98	0.828747	5459.68	2.72903	1150.94	0.575301	4766.55	2.38257
	2207.53	1.10344	4272.29	2.13551	1367.64	0.683619	4939.05	2.4688
			4782.79	2.39069	1338.75	0.669176	2221.58	1.11046
			4830.5	2.41454	1859.39	0.929418	2255.57	1.12745
					1418.7	0.70914
aver	2000.59	1	4533.52	2.26609	1369.3	0.684447	3531.38	1.76517
std dev	554.312	0.277074		0.959704		0.219696		0.904341
			MB NBs		non-MB NBs
			control	Ey OE	control	Ey OE
	normalized		1	2.26609	0.684447	1.76517
	sem		0.0876185	0.277043	0.0609326	0.261061
FOR FIG 3T
	MB NBs									non MB NBs
	control				Ey OE					Ey OE
	24 hr fed		7 d AFW		24 hr fed		7 d AFW			24 hr fed		7 d AFW	norm
	raw	norm	raw	norm	raw	norm	raw	norm		raw	norm	raw	1.53268
	1707.15	0.853322	617.331	0.308574	2019.8	1.0096	1398.26	0.698926		526.026	0.262935	3066.26	0.268669
	2602.57	1.3009	796.004	0.397885	2248.9	1.12412	1726.96	0.863226		2116.03	1.0577	537.496	0.670359
	2667.05	1.33313	1031.28	0.515486	7328.09	3.66296	607.88	0.30385		4142.7	2.07074	1341.11	0.325935
	2640.04	1.31963	946.972	0.473346	8559.57	4.27852	834.355	0.417054		5571.24	2.7848	652.063	0.748206
	2048.97	1.02418	1166.13	0.582894	4093.29	2.04604	623.254	0.311535		2021.78	1.01059	1496.85	1.09108
	921.76	0.460744	1322.18	0.660897	3353.35	1.67618	894.179	0.446957		2482.48	1.24087	2182.8	-0.0391891
	1640.59	0.820054	1519.04	0.759298	4444.02	2.22135	536.166	0.268004		6403.81	3.20096	-78.4014	1.66124
	1912.28	0.955857	1075.65	0.537666	3009.92	1.50451	936.812	0.468268		4929.76	2.46415	3323.47	0.603844
	1657.98	0.828747	925.619	0.462673	5459.68	2.72903	1210.3	0.60497		4766.55	2.38257	1208.05	0.0362502
	2207.53	1.10344	831.266	0.41551	4272.29	2.13551	1425.28	0.712429		4939.05	2.4688	72.5218	0.578084
			1290.65	0.645136	4782.79	2.39069	1049.7	0.524696		2221.58	1.11046	1156.51	0.651521
			760.458	0.380116	4830.5	2.41454	530.504	0.265174		2255.57	1.12745	1303.43
													0.689907
average	2000.59	1	1023.15	0.511423	4478.89	2.23878	1019.34	0.509522	#DIV/0!	3789.94	1.89441	1380.22	0.586387
st dev	554.312	0.277074	263.948	0.131935	2117.89	1.05863	403.03	0.201456	#DIV/0!	1885.44	0.942444	1173.12
				MB NBs				non MB NBs
				control		Ey OE		Ey OE
				24 hr fed	7 AFW	24 hr fed	7 d AFW	24 hr fed	7 d AFW
			normalized	1	0.511423	2.23878	0.509522	1.89441	0.689907
			s.e.m.	0.0876185	0.0380864	0.305601	0.0581552	0.27206	0.169275
