# Supplementary material for: Eyeless uncouples mushroom body neuroblast proliferation from dietary amino acids in Drosophila
Source: eLife. 2017 Aug 9;6:e26343. doi: 10.7554/eLife.26343 (PMC5576483; doi:10.7554/eLife.26343)
Supplement: Figure 4—source data 1. [file elife-26343-fig4-data1.xlsx]

## Sheet: control MBNBs
Time point	Animal / Lobe	# Edu+ MBNBs
24 h fed	01a	4					24 h fed	7 d AFW	1 d refed
	01b	4				animals	10	16	7
	02a	4				lobes	20	32	14
	02b	4				MEAN	4	3.78125	4
	03a	4				MEDIAN	4	4	4
	03b	4				SD	0	0.659148	0
	04a	4				SEM	0	0.116522	0
	04b	4
	05a	4
	05b	4
	06a	4
	06b	4
	07a	4
	07b	4
	08a	4
	08b	4
	09a	4
	09b	4
	10a	4
	10b	4
7 d AFW	01a	4
	01b	4
	02a	4
	02b	4
	03a	4
	03b	4
	04a	4
	04b	4
	05a	4
	05b	4
	06a	4
	06b	1
	07a	2
	07b	4
	08a	4
	08b	4
	09a	4
	09b	3
	10a	4
	10b	3
	11a	4
	11b	4
	12a	4
	12b	4
	13a	4
	13b	4
	14a	4
	14b	4
	15a	4
	15b	4
	16a	4
	16b	4
1 d AFW	01a	4
	01b	4
	02a	4
	02b	4
	03a	4
	03b	4
	04a	4
	04b	4
	05a	4
	05b	4
	06a	4
	06b	4
	07a	4
	07b	4

## Sheet: UAS-eyRNAi MBNBs
Time point	Animal / Lobe	# Edu+ MBNBs
24 h fed	01a	4					24 h fed	7 d AFW	1 d refed
	01b	4				animals	8	11	15
	02a	4				lobes	16	21	30
	02b	4				MEAN	4	1.38095	3.96667
	03a	4				MEDIAN	4	1	4
	03b	4				SD	0	1.53219	0.182574
	04a	4				SEM	0	0.334352	0.0333333
	04b	4
	05a	4
	05b	4
	06a	4
	06b	4
	07a	4
	07b	4
	08a	4
	08b	4
7 d AFW	01a	1
	01b	1
	02a	0
	02b	0
	03a	2
	03b	3
	04a	3
	04b	1
	05a	0
	05b	0
	06a	4
	06b	3
	07a	0
	07b	2
	08a	4
	08b	4
	09a	0
	09b	0
	10a	0
	10b	1
	11a	0
1 d refed	01a	4
	01b	4
	02a	4
	02b	4
	03a	4
	03b	4
	04a	4
	04b	4
	05a	4
	05b	4
	06a	4
	06b	4
	07a	4
	07b	4
	08a	4
	08b	4
	09a	3
	09b	4
	10a	4
	10b	4
	11a	4
	11b	4
	12a	4
	12b	4
	13a	4
	13b	4
	14a	4
	14b	4
	15a	4
	15b	4

## Sheet: UAS-Ey %NBs
Time point	Animal / Lobe	# Dpn+ Edu+ cells	TOTAL Dpn+ cells	% Dpn+ Edu+ cells
24 h fed	01a	43	93	0.462366			24 h fed	3 d AFW	5 d AFW	7 d AFW
	02a	62	100	0.62		animals	10	10	13	11
	03a	54	92	0.586957		lobes	10	10	13	11
	04a	61	103	0.592233		MEAN	0.480921	0.619702	0.152481	0.0885735
	05a	49	104	0.471154		MEDIAN	0.455141	0.644914	0.09375	0.0823529
	06a	35	99	0.353535		SD	0.0893022	0.164159	0.12014	0.0592713
	07a	43	96	0.447917		SEM	0.0282398	0.0519117	0.0333209	0.017871
	08a	38	97	0.391753
	09a	43	97	0.443299
	10a	44	100	0.44
3 d AFW	01a	63	99	0.636364
	02a	74	100	0.74
	03a	44	99	0.444444
	04a	82	105	0.780952
	05a	86	113	0.761062
	06a	40	101	0.39604
	07a	66	101	0.653465
	08a	46	100	0.46
	09a	91	107	0.850467
	10a	46	97	0.474227
5 d AFW	01a	4	85	0.0470588
	02a	14	92	0.152174
	03a	39	99	0.393939
	04a	6	89	0.0674157
	05a	41	103	0.398058
	06a	13	97	0.134021
	07a	9	96	0.09375
	08a	17	94	0.180851
	09a	7	100	0.07
	10a	23	102	0.22549
	11a	6	98	0.0612245
	12a	6	93	0.0645161
	13a	9	96	0.09375
7 d AFW	01a	9	92	0.0978261
	02a	4	97	0.0412371
	03a	9	87	0.103448
	04a	4	89	0.0449438
	05a	4	86	0.0465116
	06a	7	85	0.0823529
	07a	3	92	0.0326087
	08a	22	97	0.226804
	09a	14	93	0.150538
	10a	9	83	0.108434
	11a	4	101	0.039604

## Sheet: UAS-Ey NBs
Time point	Animal / Lobe	# Dpn+ Edu+ cells
7 d AFW	01a	9			animals	19
	02a	4			lobes	19
	03a	9			MEAN	8.26316
	04a	4			MEDIAN	6
	05a	4			SD	6.41909
	06a	7			SEM	1.47264
	07a	3
	08a	22
	09a	14
	10a	9
	11a	4
	12a	11
	13a	5
	14a	10
	15a	4
	16a	2
	17a	26
	18a	6
	19a	4
